# Supplementary material for: A Reproducibility-Based Computational Framework Identifies an Inducible, Enhanced Antiviral State in Dendritic Cells from HIV-1 Elite Controllers
Source: PubMed Central journal article supplement (PMC5789701; doi:10.1186/s13059-017-1385-x), 2018-01-29
Supplement: 13059_2017_1385_MOESM7_ESM.pdf [file 13059_2017_1385_MOESM7_ESM.pdf]

## **Additional Online Methods (AOM) for:**

### **A Reproducibility-Based Computational Framework Identifies An Inducible, Enhanced Antiviral Dendritic Cell State In HIV-1 Elite Controllers**

Enrique Martin-Gayo<sup>1,†</sup>, Michael B. Cole<sup>2,†</sup>, Kellie E. Kolb<sup>1,3,4,†</sup>, Zhengyu Ouyang<sup>1</sup>, Jacqueline Cronin<sup>1</sup>, Samuel W. Kazer<sup>1,3,4</sup>, Jose Ordovas-Montanes<sup>1,3,4</sup>, Mathias Lichtenfeld<sup>1,5</sup>, Bruce D. Walker<sup>1,6</sup>, Nir Yosef<sup>1,7,8,\*</sup>, Alex K. Shalek<sup>1,3,4,\*</sup>, Xu G. Yu<sup>1,5,\*</sup>

<sup>1</sup> Ragon Institute of MGH, MIT and Harvard, Cambridge, MA

<sup>2</sup> Department of Physics, University of California, Berkeley, Berkeley, CA

<sup>3</sup> Institute for Medical Engineering & Science (IMES) and Department of Chemistry, MIT, Cambridge, MA

<sup>4</sup> Broad Institute of MIT and Harvard, Cambridge, MA

<sup>5</sup> Infectious Disease Division, Brigham and Women's Hospital, Boston, MA

<sup>6</sup> Howard Hughes Medical Institute, Chevy Chase, MD

<sup>7</sup> Electrical Engineering & Computer Sciences, UC Berkeley, Berkeley, CA

<sup>8</sup> Chan Zuckerberg Biohub Investigator

† These authors contributed equally to this work

\* These senior authors contributed equally to this work

\* To whom correspondence should be addressed: [niryosef@berkeley.edu](mailto:niryosef@berkeley.edu) (NY), [shalek@mit.edu](mailto:shalek@mit.edu) (AKS), [xyu@mgh.harvard.edu](mailto:xyu@mgh.harvard.edu) (XY)

**APPENDIX - Extending Irreproducible Discovery Rate (IDR) Model Inference to m  
Sample Replicates**

# Extending Irreproducible Discovery Rate (IDR) Model Inference to $m$ Sample Replicates

## 1 Covariance Matrix, Determinant, and Inverse

In section 4 of the Supplementary Materials for Li et al. 2011<sup>24</sup>, “Extension of our model to the case of  $m > 2$ .” the authors present their model extended to  $m$ -replicates. For each component,  $k = 0, 1$ , the  $m$ -dimensional covariance matrix can be written:

$$\Sigma_k = \sigma_k^2 [(1 - \rho_k) I + \rho_k \mathbb{1}] \quad (1)$$

Below we will briefly consider properties of this matrix.

### 1.1 Covariance Matrix Determinant

The matrix determinant can be computed via Sylvester’s determinant theorem:

$$\begin{aligned} |\Sigma_k| &= |\sigma_k^2 [(1 - \rho_k) I + \rho_k \mathbb{1}]| \\ &= \sigma_k^{2m} (1 - \rho_k)^m \left| I + \frac{\rho_k}{1 - \rho_k} \mathbb{1} \right| \\ &= \sigma_k^{2m} (1 - \rho_k)^m \left( 1 + \frac{\rho_k}{1 - \rho_k} m \right) \\ &= \sigma_k^{2m} (1 - \rho_k)^{m-1} (1 + (m - 1) \rho_k) \end{aligned} \quad (2)$$

## 1.2 Covariance Matrix Inverse

The matrix inverse can be computed via the Sherman-Morrison formula:

$$\begin{aligned}
\Sigma_k^{-1} &= (\sigma_k^2 [(1 - \rho_k) I + \rho_k \mathbb{1}])^{-1} \\
&= \frac{1}{\sigma_k^2 (1 - \rho_k)} \left( I + \frac{\rho_k}{1 - \rho_k} \mathbb{1} \right)^{-1} \\
&= \frac{1}{\sigma_k^2 (1 - \rho_k)} \left( I - \frac{\frac{\rho_k}{1 - \rho_k} \mathbb{1}}{1 + m \frac{\rho_k}{1 - \rho_k}} \right) \\
&= \frac{1}{\sigma_k^2 (1 - \rho_k)} \left( I - \frac{\rho_k}{1 + (m - 1) \rho_k} \mathbb{1} \right)
\end{aligned} \tag{3}$$

## 2 Maximum Log-Likelihood of Pseudo-Data

Considering the general model above, we can extend Equation (1.5) from section 1 of the Supplementary Materials for Li et al. 2011<sup>24</sup>, "Estimation algorithm for the copula mixture model." This equation represents the second term of  $Q(\theta, \theta^t)$ :

$$\begin{aligned}
El_z &= \sum_{i=1}^n EK_i \left\{ \log \left( \frac{1}{\sqrt{(2\pi)^m \sigma_1^{2m} (1 - \rho_1)^{m-1} (1 + (m - 1) \rho_1)}} \right) \right. \\
&\quad \left. - \frac{1}{2\sigma_1^2 (1 - \rho_1)} \sum_{p,q}^m \left\{ (z_{i,p} - \mu_1) (z_{i,q} - \mu_1) \left( I_{pq} - \frac{\rho_1}{1 + (m - 1) \rho_1} \mathbb{1}_{pq} \right) \right\} \right\}
\end{aligned} \tag{4}$$

As outlined in that section, we can obtain estimates for model parameters ( $\mu_1$ ,  $\sigma_1$ , and  $\rho_1$ ) by maximizing the expected likelihood.

### 2.1 $\mu_1$ Derivative and MLE

Taking derivatives w.r.t. the mean paramater,  $\mu_1$ , we have the following:

$$\frac{\partial l_z}{\partial \mu_1} = \sum_{i=1}^n K_i \left\{ \frac{1}{2\sigma_1^2 (1 - \rho_1)} \sum_{p,q}^m \left\{ (z_{i,p} + z_{i,q} - 2\mu_1) \left( I_{pq} - \frac{\rho_1}{1 + (m - 1) \rho_1} \mathbb{1}_{pq} \right) \right\} \right\} \tag{5}$$

Setting the right-hand to zero (assuming  $\sigma_1 > 0$ ,  $\rho_1 < 1$ , and  $m > 0$ ):

$$0 = \sum_{i=1}^n K_i (\bar{z}_i - \mu_1) \tag{6}$$

Solving for  $K_i$ , we see that the *MLE* estimate of the mean is a weighted mean of replicate means:

$$\mu_1^{(t+1)} = \frac{\sum_{i=1}^n K_i^{(t+1)} \bar{z}_i}{\sum_{i=1}^n K_i^{(t+1)}} \quad (7)$$

## 2.2 $\sigma_1$ Derivative

Taking derivatives w.r.t. the standard deviation,  $\sigma_1$ , we have the following:

$$\frac{\partial l_z}{\partial \sigma_1} = \sum_{i=1}^n K_i \left\{ -\frac{m}{\sigma_1} + \frac{1}{\sigma_1^3 (1 - \rho_1)} \sum_{p,q}^m \left\{ (z_{i,p} - \mu_1)(z_{i,q} - \mu_1) \left( I_{pq} - \frac{\rho_1}{1 + (m-1)\rho_1} \mathbb{1}_{pq} \right) \right\} \right\} \quad (8)$$

Setting the right-hand to zero (assuming  $\sigma_1 > 0$ , and  $m > 0$ ):

$$0 = \sum_{i=1}^n K_i \left\{ -\sigma_1^2 + \frac{1}{m(1 - \rho_1)} \sum_{p,q}^m \left\{ (z_{i,p} - \mu_1)(z_{i,q} - \mu_1) \left( I_{pq} - \frac{\rho_1}{1 + (m-1)\rho_1} \mathbb{1}_{pq} \right) \right\} \right\} \quad (9)$$

## 2.3 $\rho_1$ Derivative

Taking derivatives w.r.t. the correlation coefficient,  $\rho_1$ , we have the following:

$$\begin{aligned} \frac{\partial l_z}{\partial \rho_1} = & \sum_{i=1}^n EK_i \left\{ \frac{1}{2} \left\{ \frac{m-1}{1-\rho_1} - \frac{m-1}{1+(m-1)\rho_1} \right\} \right. \\ & - \frac{1}{2\sigma_1^2 (1-\rho_1)^2} \sum_{p,q}^m \left\{ (z_{i,p} - \mu_1)(z_{i,q} - \mu_1) \left( I_{pq} - \frac{\rho_1}{1+(m-1)\rho_1} \mathbb{1}_{pq} \right) \right\} \\ & \left. + \frac{1}{2\sigma_1^2 (1-\rho_1)} \sum_{p,q}^m \left\{ (z_{i,p} - \mu_1)(z_{i,q} - \mu_1) \left( \frac{1}{(1+(m-1)\rho_1)^2} \mathbb{1}_{pq} \right) \right\} \right\} \quad (10) \end{aligned}$$

Setting the right-hand to zero (assuming  $\sigma_1 > 0$ , and  $\rho_1 < 1$ ):

$$\begin{aligned} 0 = & \sum_{i=1}^n EK_i \left\{ \left\{ \frac{1}{1-\rho_1} - \frac{1}{1+(m-1)\rho_1} \right\} (m-1) \sigma_1^2 (1-\rho_1)^2 \right. \\ & - \sum_{p,q}^m \left\{ (z_{i,p} - \mu_1)(z_{i,q} - \mu_1) \left( I_{pq} - \frac{\rho_1}{1+(m-1)\rho_1} \mathbb{1}_{pq} \right) \right\} \\ & \left. + \sum_{p,q}^m \left\{ (z_{i,p} - \mu_1)(z_{i,q} - \mu_1) \left( \frac{1-\rho_1}{(1+(m-1)\rho_1)^2} \mathbb{1}_{pq} \right) \right\} \right\} \quad (11) \end{aligned}$$

## 2.4 MLEs for $\sigma_1$ and $\rho_1$

In order to solve the system of equations (9) and (11) above we define a weighted covariance,  $C$ , and a total weight,  $W$ :

$$\begin{aligned} C_{pq}^{(t+1)} &= \sum_{i=1}^n K_i^{(t+1)} \left( z_{i,p} - \mu_1^{(t+1)} \right) \left( z_{i,q} - \mu_1^{(t+1)} \right) \\ W^{(t+1)} &= \sum_{i=1}^n K_i^{(t+1)} \end{aligned} \quad (12)$$

The trace and sum of  $C$  are important data summaries:

$$\begin{aligned} T^{(t+1)} &= \sum_{p,q}^m C_{pq}^{(t+1)} I_{pq} \\ S^{(t+1)} &= \sum_{p,q}^m C_{pq}^{(t+1)} \mathbb{1}_{pq} \end{aligned} \quad (13)$$

These definitions allow us to separate variance and correlation terms in equations (9) and (11):

$$\sigma_1^{2(t+1)} = \frac{1}{W^{(t+1)}m \left( 1 - \rho_1^{(t+1)} \right)} \left\{ T^{(t+1)} - \frac{\rho_1^{(t+1)}}{1 + (m-1)\rho_1^{(t+1)}} S^{(t+1)} \right\} \quad (14)$$

$$\begin{aligned} \sigma_1^{2(t+1)} &= \frac{1}{W^{(t+1)} \left\{ \frac{1}{1 - \rho_1^{(t+1)}} - \frac{1}{1 + (m-1)\rho_1^{(t+1)}} \right\} (m-1) \left( 1 - \rho_1^{(t+1)} \right)^2} \\ &\times \left\{ T^{(t+1)} - \frac{\rho_1^{(t+1)}}{1 + (m-1)\rho_1^{(t+1)}} S^{(t+1)} - \frac{1 - \rho_1^{(t+1)}}{\left( 1 + (m-1)\rho_1^{(t+1)} \right)^2} S^{(t+1)} \right\} \end{aligned} \quad (15)$$

By equating the right-sides of equations (14) and (1) we obtain a simple expression for the MLE correlation coefficient:

$$\rho_1^{(t+1)} = \frac{S^{(t+1)} - T^{(t+1)}}{T^{(t+1)}(m-1)} \quad (16)$$

Plugging this expression into the variance equation (14) we obtain a simple expression for MLE variance as well:

$$\sigma_1^{2(t+1)} = \frac{T^{(t+1)}}{W^{(t+1)}m} \quad (17)$$
